# Supplementary material for: Harnessing the Medicaid Analytic eXtract (MAX) to Evaluate Medications in Pregnancy: Design Considerations
Source: PLOS journal article supplement (doi:10.1371/journal.pone.0067405), 2013-06-26
Supplement: S2 (10.1371/journal.pone.0067405.s002) [file journal.pone.0067405.s002]

## Supporting Information for MAX Pregnancy Cohort

Table S1. Delivery-related procedure codes used to identify inpatient and outpatient deliveries from the Medicaid Analytic eXtract, 2000-2007.

| Code         | Description                                                                                                          |
|--------------|----------------------------------------------------------------------------------------------------------------------|
| <b>CPT-4</b> |                                                                                                                      |
| 01960        | Anesthesia for vaginal delivery only                                                                                 |
| 01961        | Anesthesia for cesarean delivery only                                                                                |
| 01962        | Anesthesia for urgent hysterectomy following delivery                                                                |
| 01963        | Anesthesia for cesarean hysterectomy w/o any labor analgesia/anesthesia care                                         |
| 01967        | Neuraxial labor analgesia/anesthesia, planned vaginal delivery                                                       |
| 01968        | Anesthesia for cesarean delivery following neuraxial labor analgesia/anesthesia                                      |
| 01969        | Anesthesia for cesarean hysterectomy following neuraxial labor                                                       |
| 59050        | Fetal monitoring in labor, physician w/written report                                                                |
| 59051        | Fetal monitoring in labor, physician w/written report; interpretation only                                           |
| 59400        | Routine obstetric care, antepartum care, vaginal delivery, & postpartum care                                         |
| 59409        | Vaginal delivery only (w/wo episiotomy &/or forceps)                                                                 |
| 59410        | Vaginal delivery only (w/wo episiotomy &/or forceps); w/postpartum care                                              |
| 59412        | External cephalic version, w/wo tocolysis                                                                            |
| 59414        | Delivery, placenta (separate procedure)                                                                              |
| 59430        | Postpartum care only (separate procedure)                                                                            |
| 59510        | Routine obstetric care w/antepartum care, cesarean delivery, & postpartum care                                       |
| 59514        | Cesarean delivery only                                                                                               |
| 59515        | Cesarean delivery only; w/postpartum care                                                                            |
| 59525        | Subtotal/total hysterectomy after cesarean delivery                                                                  |
| 59610        | Routine obstetric care, vaginal delivery, w/ antepartum, postpartum care, previous c-section                         |
| 59612        | Vaginal delivery only, previous cesarean delivery                                                                    |
| 59614        | Vaginal delivery only, previous cesarean delivery; w/postpartum care                                                 |
| 59618        | Routine obstetric care, ante/postpartum, cesarean delivery after failed vaginal delivery, previous cesarean delivery |
| 59620        | Cesarean delivery, after failed vaginal delivery, previous cesarean delivery                                         |
| 59622        | Cesarean delivery, after failed vaginal delivery, previous cesarean delivery; w/postpartum care                      |
| 99436        | Attendance at delivery, at request of delivering physician, & stabilization of newborn                               |
| 99440        | Newborn resuscitation                                                                                                |
| <b>ICD-9</b> |                                                                                                                      |
| 72           | Forceps, vacuum, and breech delivery                                                                                 |
| 72.0         | Low forceps operation                                                                                                |
| 72.1         | Low forceps operation with episiotomy                                                                                |
| 72.2         | Mid forceps operation                                                                                                |
| 72.21        | Mid forceps operation with episiotomy                                                                                |
| 72.29        | Other mid forceps operation                                                                                          |
| 72.3         | High forceps operation                                                                                               |
| 72.31        | High forceps operation with episiotomy                                                                               |

|       |                                                            |
|-------|------------------------------------------------------------|
| 72.39 | Other high forceps operation                               |
| 72.4  | Forceps rotation of fetal head                             |
| 72.5  | Breech extraction                                          |
| 72.51 | Partial breech extraction with forceps to aftercoming head |
| 72.52 | Other partial breech extraction                            |
| 72.53 | Total breech extraction with forceps to aftercoming head   |
| 72.54 | Other total breech extraction                              |
| 72.6  | Forceps application to aftercoming head                    |
| 72.7  | Vacuum extraction                                          |
| 72.71 | Vacuum extraction with episiotomy                          |
| 72.79 | Other vacuum extraction                                    |
| 72.8  | Other specified instrumental delivery                      |
| 72.9  | Unspecified instrumental delivery                          |
| 73    | Other procedures inducing or assisting delivery            |
| 73.0  | Artificial rupture of membranes                            |
| 73.01 | Induction of labor by artificial rupture of membranes      |
| 73.09 | Other artificial rupture of membranes                      |
| 73.1  | Other surgical induction of labor                          |
| 73.2  | Internal and combined version and extraction               |
| 73.21 | Internal and combined version without extraction           |
| 73.22 | Internal and combined version with extraction              |
| 73.3  | Failed forceps                                             |
| 73.4  | Medical induction of labor                                 |
| 73.5  | Manually assisted delivery                                 |
| 73.51 | Manual rotation of fetal head                              |
| 73.59 | Other manually assisted delivery                           |
| 73.6  | Episiotomy                                                 |
| 73.8  | Operations on fetus to facilitate delivery                 |
| 73.9  | Other operations assisting delivery                        |
| 73.91 | External version                                           |
| 73.92 | Replacement of prolapsed umbilical cord                    |
| 73.93 | Incision of cervix to assist delivery                      |
| 73.94 | Pubiotomy to assist delivery                               |
| 73.99 | Other operations assisting delivery                        |
| 74    | Cesarean section and removal of fetus                      |
| 74.0  | Classical cesarean section                                 |
| 74.1  | Low cervical cesarean section                              |
| 74.2  | Extraperitoneal cesarean section                           |
| 74.4  | Cesarean section of other specified type                   |
| 74.9  | Cesarean section of unspecified type                       |
| 74.91 | Hysterotomy to terminate pregnancy                         |
| 74.99 | Other cesarean section of unspecified type                 |
| 75.4  | Manual removal of retained placenta                        |

---

Abbreviations: CPT-4, *Current Procedural Terminology*, Fourth Edition; ICD-9, *International Classification of Diseases*, Ninth Revision.

Table S2. Elements of the Case Number used for linkage, enrollment type exclusions, number of pregnancies, percentage of cohort, and percentage of pregnancies with at least one prescription medication dispensed during pregnancy by state; Medicaid Analytic eXtract, 2000-2007.

| State | Case Number Elements | Enrollment Types Excluded | N Pregnancies | % of Cohort | % with $\geq 1$ Medication During Pregnancy |
|-------|----------------------|---------------------------|---------------|-------------|---------------------------------------------|
| AK    | Full                 | None                      | 652           | 0.1         | 89.0                                        |
| AL    | Full                 | Traditional               | 12300         | 1.0         | 95.7                                        |
| AR    | First 7 Digits       | None                      | 2610          | 0.2         | 90.2                                        |
| CA    | Full                 | None                      | 257148        | 20.6        | 87.6                                        |
| CO    | First 8 Digits       | Capitated                 | 9113          | 0.7         | 89.9                                        |
| CT    | No Linkage           | -                         | 0             | 0           | 0                                           |
| DC    | Full                 | Capitated                 | 533           | 0.0         | 91.0                                        |
| DE    | Full                 | Traditional               | 8380          | 0.7         | 94.0                                        |
| FL    | Full                 | Capitated                 | 26582         | 2.1         | 92.8                                        |
| GA    | Full                 | None                      | 32221         | 2.6         | 93.5                                        |
| HI    | Full                 | None                      | 9619          | 0.8         | 87.2                                        |
| IA    | First 9 Digits       | None                      | 16372         | 1.3         | 94.9                                        |
| ID    | Full                 | None                      | 4086          | 0.3         | 95.1                                        |
| IL    | Full                 | None                      | 101031        | 8.1         | 92.6                                        |
| IN    | Full                 | None                      | 46628         | 3.7         | 86.8                                        |
| KS    | Full                 | None                      | 13538         | 1.1         | 92.7                                        |
| KY    | Full                 | None                      | 28360         | 2.3         | 94.5                                        |
| LA    | Full                 | None                      | 27514         | 2.2         | 92.0                                        |
| MA    | Full                 | Capitated                 | 20267         | 1.6         | 95.2                                        |
| MD    | Full                 | Traditional               | 19459         | 1.6         | 91.6                                        |
| ME    | Full                 | None                      | 4554          | 0.4         | 95.1                                        |
| MI    | Full                 | Exclude All               | 0             | 0           | 0                                           |
| MN    | Full                 | None                      | 41357         | 3.3         | 92.0                                        |
| MO    | Full                 | None                      | 47860         | 3.8         | 93.8                                        |
| MS    | Full                 | None                      | 30087         | 2.4         | 94.4                                        |
| MT    | No Linkage           | -                         | 0             | 0           | 0                                           |
| NC    | Full                 | Capitated                 | 25042         | 2.0         | 95.3                                        |
| ND    | Full                 | None                      | 3655          | 0.3         | 87.4                                        |
| NE    | Full                 | None                      | 5599          | 0.4         | 96.4                                        |
| NH    | Full                 | None                      | 3193          | 0.3         | 92.5                                        |
| NJ    | First 10 Digits      | None                      | 29330         | 2.3         | 92.8                                        |
| NM    | Full                 | None                      | 17549         | 1.4         | 90.7                                        |
| NV    | Full                 | Capitated                 | 1381          | 0.1         | 89.7                                        |
| NY    | Full                 | None                      | 94713         | 7.6         | 89.6                                        |
| OH    | Full                 | Capitated                 | 54968         | 4.4         | 96.9                                        |
| OK    | Full                 | None                      | 24206         | 1.9         | 91.2                                        |
| OR    | Full                 | None                      | 15753         | 1.3         | 41.6                                        |
| PA    | Full                 | Capitated                 | 14677         | 1.2         | 95.6                                        |
| RI    | Full                 | None                      | 5485          | 0.4         | 94.6                                        |
| SC    | Full                 | Capitated                 | 9439          | 0.8         | 96.0                                        |
| SD    | Full                 | None                      | 5139          | 0.4         | 65.3                                        |
| TN    | Full                 | None                      | 71164         | 5.7         | 96.0                                        |

|              |                 |           |                |              |             |
|--------------|-----------------|-----------|----------------|--------------|-------------|
| TX           | Full            | Capitated | 15198          | 1.2          | 95.8        |
| UT           | Full            | None      | 5157           | 0.4          | 93.8        |
| VA           | Full            | None      | 18991          | 1.5          | 84.5        |
| VT           | Full            | None      | 6334           | 0.5          | 90.8        |
| WA           | First 10 Digits | Capitated | 4472           | 0.4          | 95.8        |
| WI           | Full            | None      | 50216          | 4.0          | 93.4        |
| WV           | Full            | Capitated | 5781           | 0.5          | 96.1        |
| WY           | Full            | None      | 1162           | 0.1          | 89.9        |
| <b>Total</b> | -               | -         | <b>1248875</b> | <b>100.0</b> | <b>91.0</b> |

Table S3. Demographic characteristics on the delivery date among women in the base cohort and women in the linked pre-eligibility cohort; Medicaid Analytic eXtract, 2000-2007.

| Characteristic                | Base Cohort<br>N=1,248,875 |      | Linked Pre-<br>Eligibility Cohort<br>N=6,107,572 |      |
|-------------------------------|----------------------------|------|--------------------------------------------------|------|
| Age, Years (Median, IQ Range) | 23                         | 7    | 23                                               | 7    |
| Race (N, %)                   |                            |      |                                                  |      |
| White                         | 509122                     | 40.8 | 2897648                                          | 47.4 |
| Black                         | 414192                     | 33.2 | 1551463                                          | 25.4 |
| Hispanic                      | 230844                     | 18.5 | 1154984                                          | 18.9 |
| Asian or Pacific Islander     | 42287                      | 3.4  | 194288                                           | 3.2  |
| Other                         | 25709                      | 2.1  | 130013                                           | 2.1  |
| Unknown                       | 26721                      | 2.1  | 179176                                           | 2.9  |
| Eligibility (N, %)            |                            |      |                                                  |      |
| Disabled                      | 38439                      | 3.1  | 59310                                            | 1.0  |
| Child <21                     | 196038                     | 15.7 | 640665                                           | 10.5 |
| Adult*                        | 1014398                    | 81.2 | 5407213                                          | 88.5 |
| Unknown or Not Eligible       | 0                          | 0    | 384                                              | 0    |

\*Adult includes women with dependent children and women who became eligible for Medicaid because of pregnancy.

Table S4. The total number of pregnancies and the percentage of pregnancies that have more than one infant MSIS\_ID from the infant outcomes cohort, and the number of pregnancies with one infant MSIS\_ID from the infant outcomes cohort and the percentage of pregnancies in which woman-infant pairs did not share the same zip code among pregnancies with one infant MSIS\_ID from the infant outcomes cohort by state; Medicaid Analytic eXtract, 2000-2007.

| State | N<br>Pregnancies<br>Total | % of<br>Pregnancies<br>with >1<br>Infant<br>MSIS_ID | N<br>Pregnancies<br>with 1<br>Infant<br>MSIS_ID | % of<br>Pregnancies<br>not Matching<br>on Zip Code |
|-------|---------------------------|-----------------------------------------------------|-------------------------------------------------|----------------------------------------------------|
| AK    | 634                       | 1.4                                                 | 625                                             | 7.4                                                |
| AL    | 11617                     | 5.2                                                 | 11011                                           | 8.5                                                |
| AR    | 2170                      | 2.2                                                 | 2122                                            | 10.2                                               |
| CA    | 209599                    | 8.2                                                 | 192379                                          | 3.4                                                |
| CO    | 9024                      | 1.3                                                 | 8903                                            | 2.4                                                |
| CT    | 0                         | 0                                                   | 0                                               | 0                                                  |
| DC    | 491                       | 1.2                                                 | 485                                             | 3.1                                                |
| DE    | 8363                      | 1.6                                                 | 8226                                            | 0.6                                                |
| FL    | 25476                     | 2.7                                                 | 24796                                           | 7.2                                                |
| GA    | 31627                     | 10.7                                                | 28246                                           | 5.6                                                |
| HI    | 9475                      | 1.3                                                 | 9351                                            | 3.3                                                |
| IA    | 16253                     | 1.4                                                 | 16029                                           | 3.9                                                |
| ID    | 4027                      | 1.6                                                 | 3962                                            | 6.1                                                |
| IL    | 99787                     | 1.4                                                 | 98346                                           | 12.2                                               |
| IN    | 46464                     | 1.5                                                 | 45752                                           | 2.3                                                |
| KS    | 13257                     | 1.8                                                 | 13018                                           | 14.2                                               |
| KY    | 27389                     | 6.5                                                 | 25613                                           | 10.2                                               |
| LA    | 25136                     | 26.7                                                | 18429                                           | 4.1                                                |
| MA    | 19944                     | 5.2                                                 | 18917                                           | 2.0                                                |
| MD    | 19218                     | 1.8                                                 | 18865                                           | 10.5                                               |
| ME    | 4381                      | 1.7                                                 | 4308                                            | 1.2                                                |
| MI    | 0                         | 0                                                   | 0                                               | 0                                                  |
| MN    | 40834                     | 10.9                                                | 36391                                           | 1.6                                                |
| MO    | 47415                     | 1.9                                                 | 46529                                           | 3.7                                                |
| MS    | 28438                     | 15.5                                                | 24023                                           | 9.5                                                |
| MT    | 0                         | 0                                                   | 0                                               | 0                                                  |
| NC    | 24800                     | 1.8                                                 | 24351                                           | 5.7                                                |
| ND    | 3619                      | 1.4                                                 | 3569                                            | 3.4                                                |
| NE    | 5513                      | 1.1                                                 | 5451                                            | 9.8                                                |
| NH    | 3154                      | 1.4                                                 | 3109                                            | 1.0                                                |
| NJ    | 27407                     | 21.1                                                | 21634                                           | 0.5                                                |
| NM    | 17022                     | 6.2                                                 | 15965                                           | 5.7                                                |
| NV    | 1243                      | 13.5                                                | 1075                                            | 2.6                                                |
| NY    | 92946                     | 2.9                                                 | 90209                                           | 0.4                                                |
| OH    | 54339                     | 1.7                                                 | 53424                                           | 2.9                                                |
| OK    | 23351                     | 4.7                                                 | 22249                                           | 13.5                                               |

|              |                |            |                |            |
|--------------|----------------|------------|----------------|------------|
| OR           | 15607          | 1.8        | 15334          | 13.2       |
| PA           | 14640          | 1.4        | 14440          | 1.9        |
| RI           | 5408           | 1.7        | 5316           | 1.0        |
| SC           | 9395           | 2.7        | 9142           | 0.7        |
| SD           | 5056           | 1.7        | 4970           | 2.9        |
| TN           | 64833          | 1.7        | 63716          | 4.8        |
| TX           | 14983          | 1.7        | 14727          | 3.5        |
| UT           | 5120           | 1.3        | 5055           | 5.8        |
| VA           | 18288          | 2.4        | 17857          | 3.5        |
| VT           | 6116           | 3.6        | 5897           | 0.6        |
| WA           | 3798           | 1.3        | 3747           | 2.3        |
| WI           | 49072          | 19.2       | 39636          | 3.3        |
| WV           | 5406           | 19.3       | 4365           | 4.7        |
| WY           | 1145           | 3.8        | 1101           | 4.1        |
| <b>Total</b> | <b>1173280</b> | <b>6.0</b> | <b>1102665</b> | <b>4.9</b> |
